# Supplementary material
Source: PubMed Central journal article supplement (PMC9484726)

Figure 1

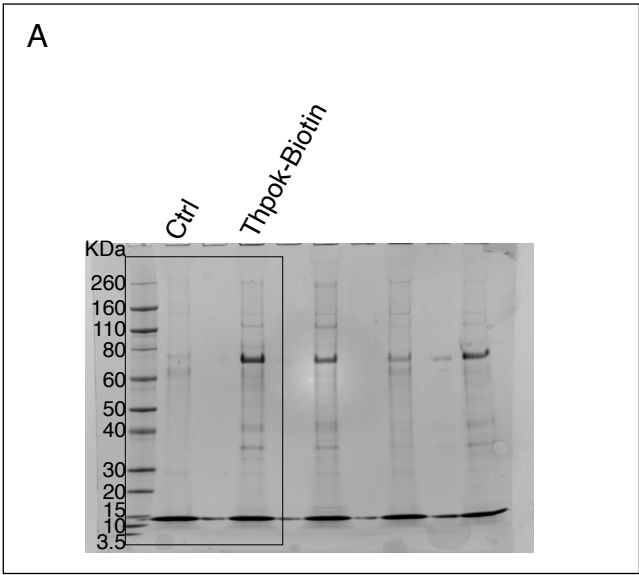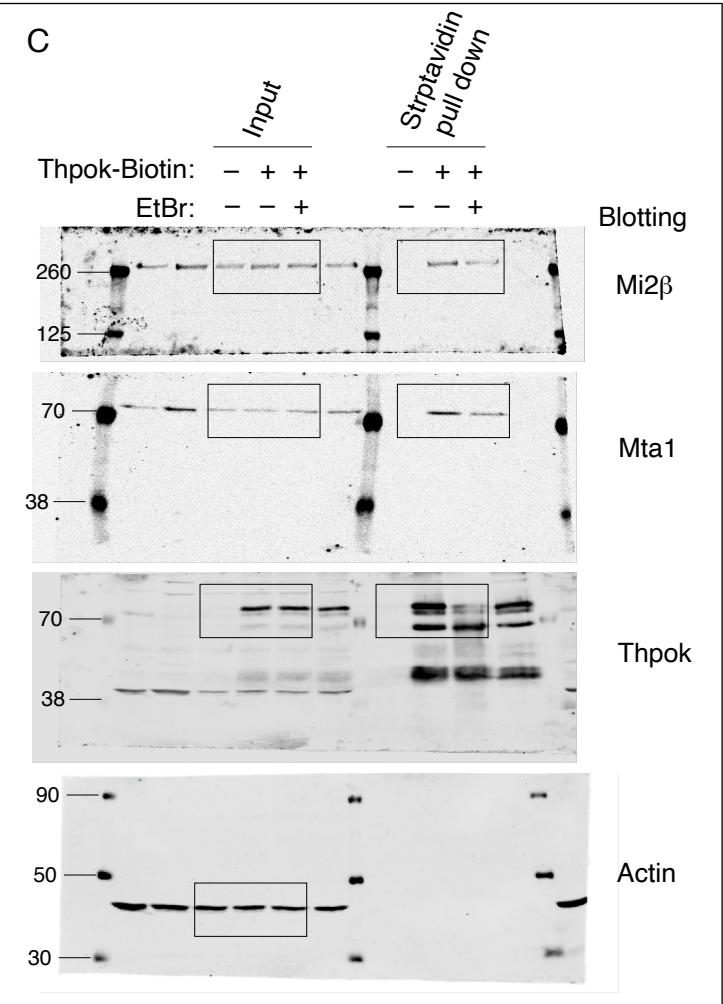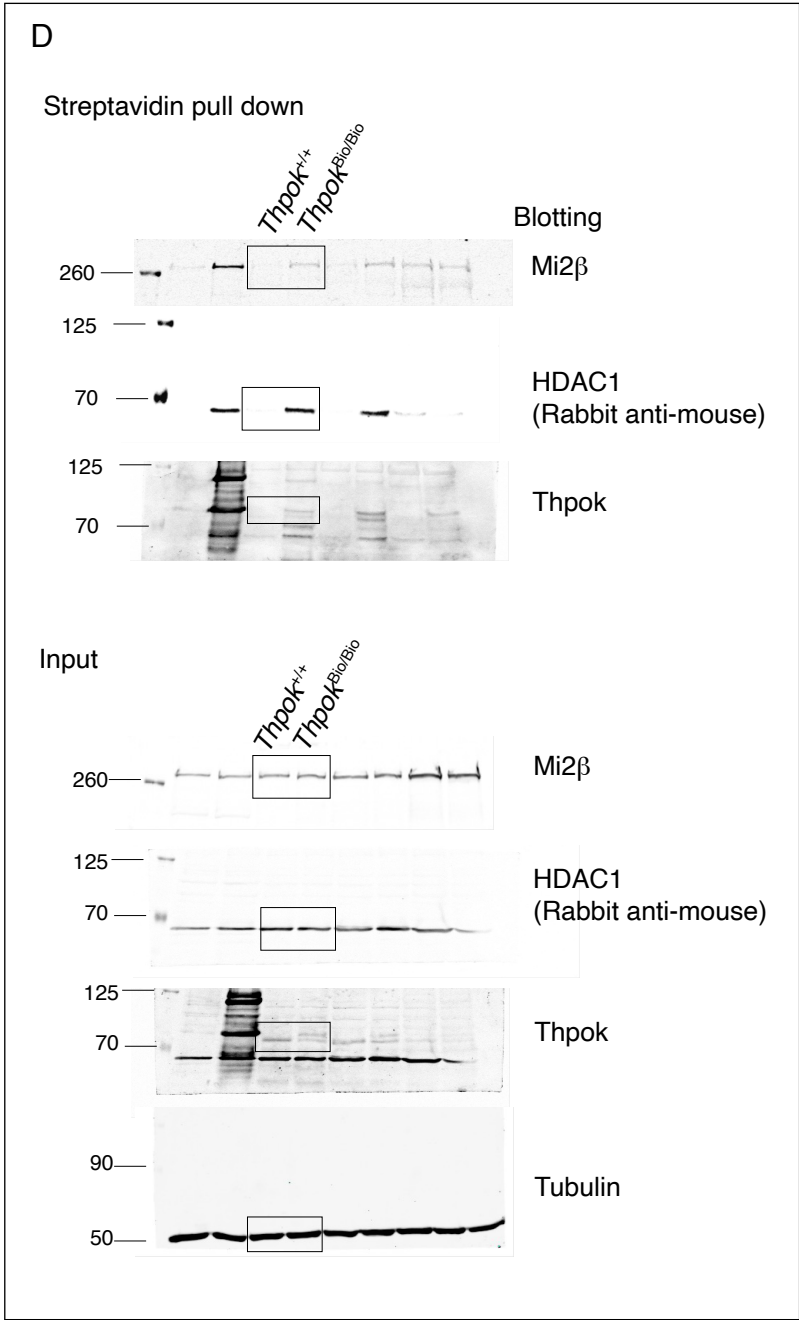

Figure 3B

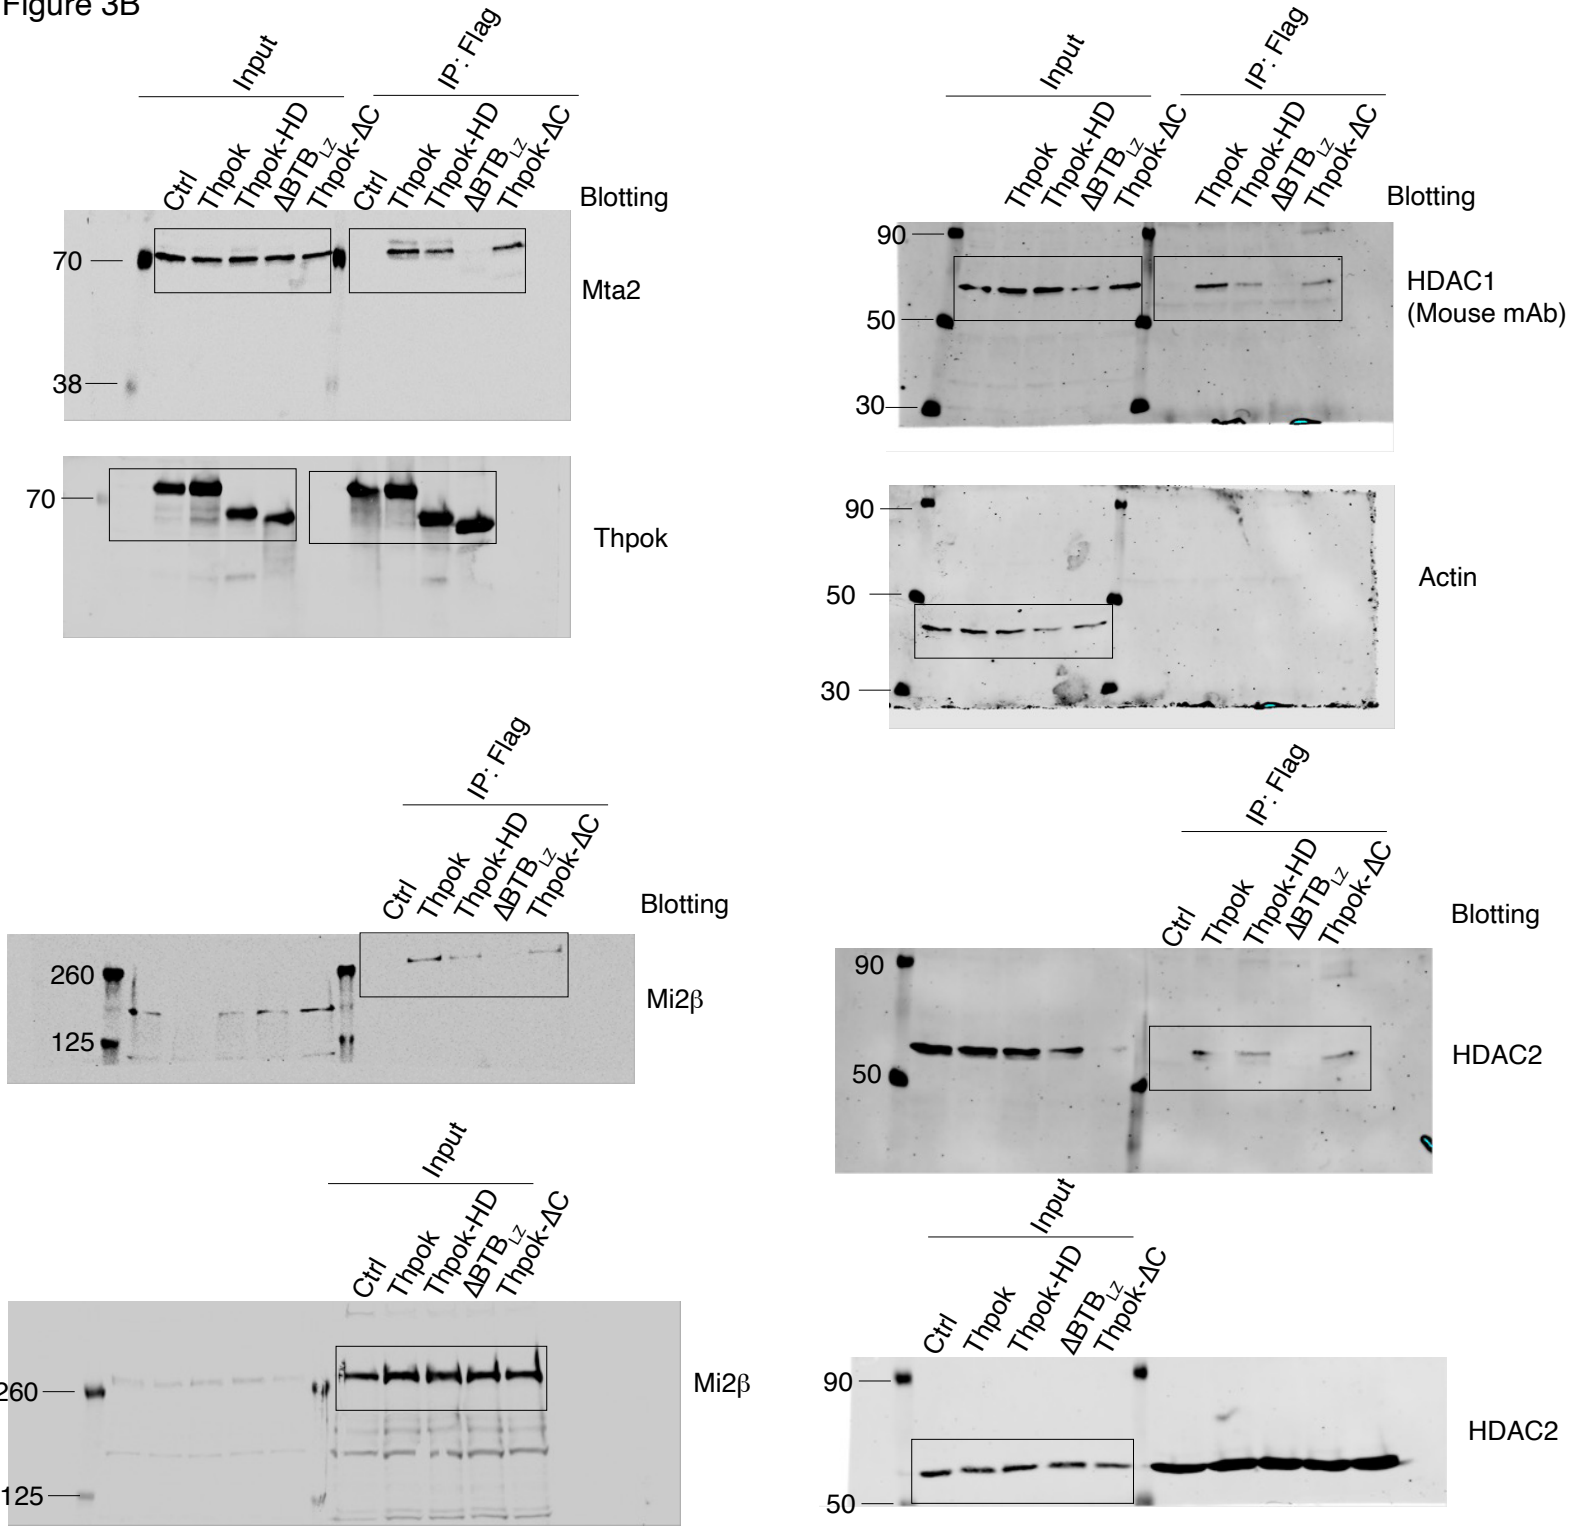

Figure 4B

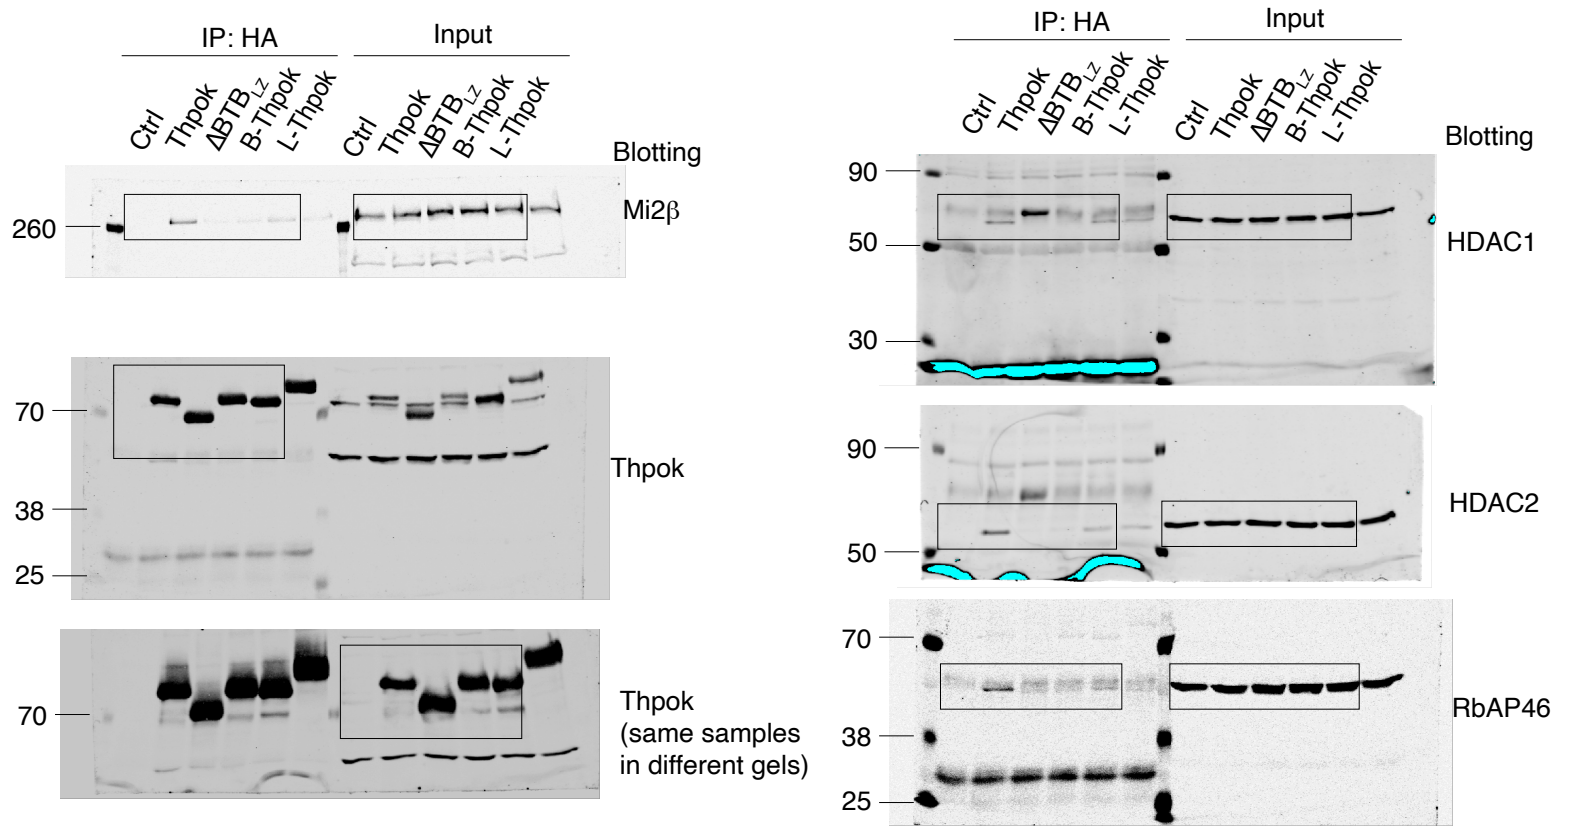

Figure 5B

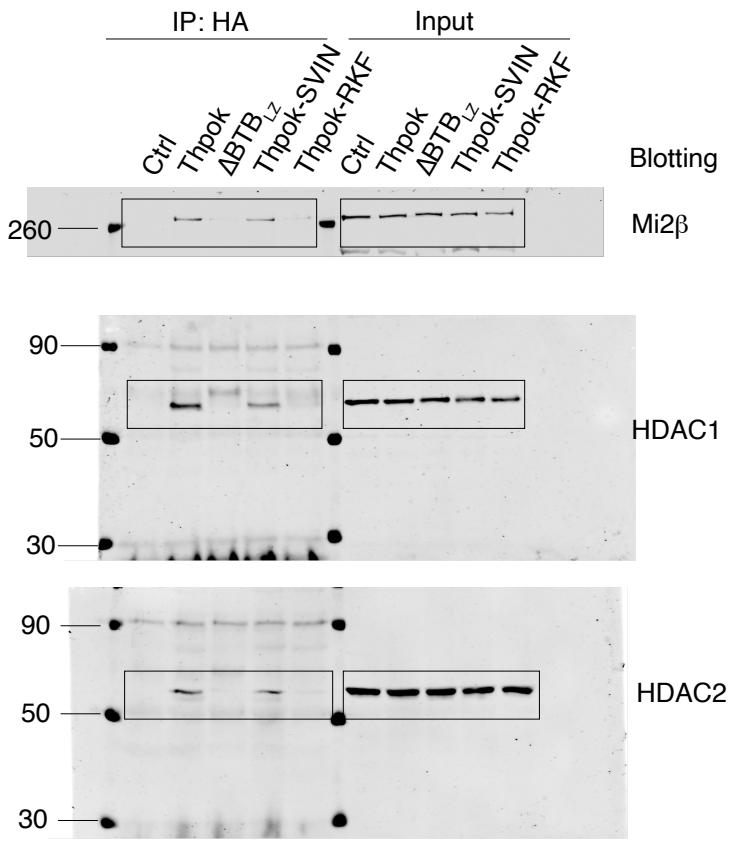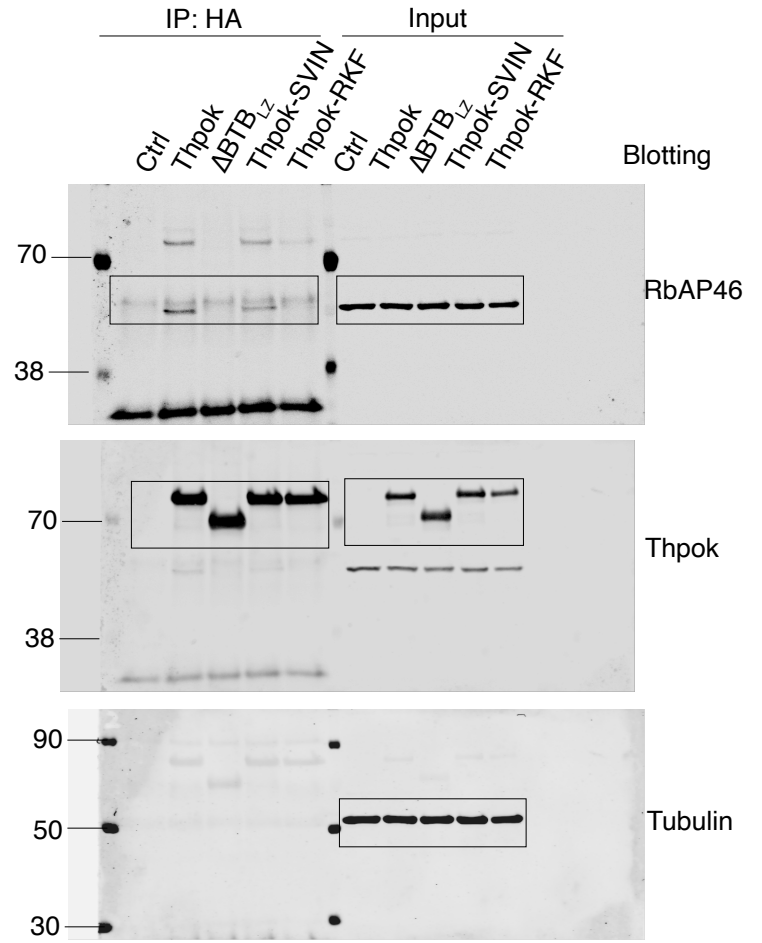

Figure 6B

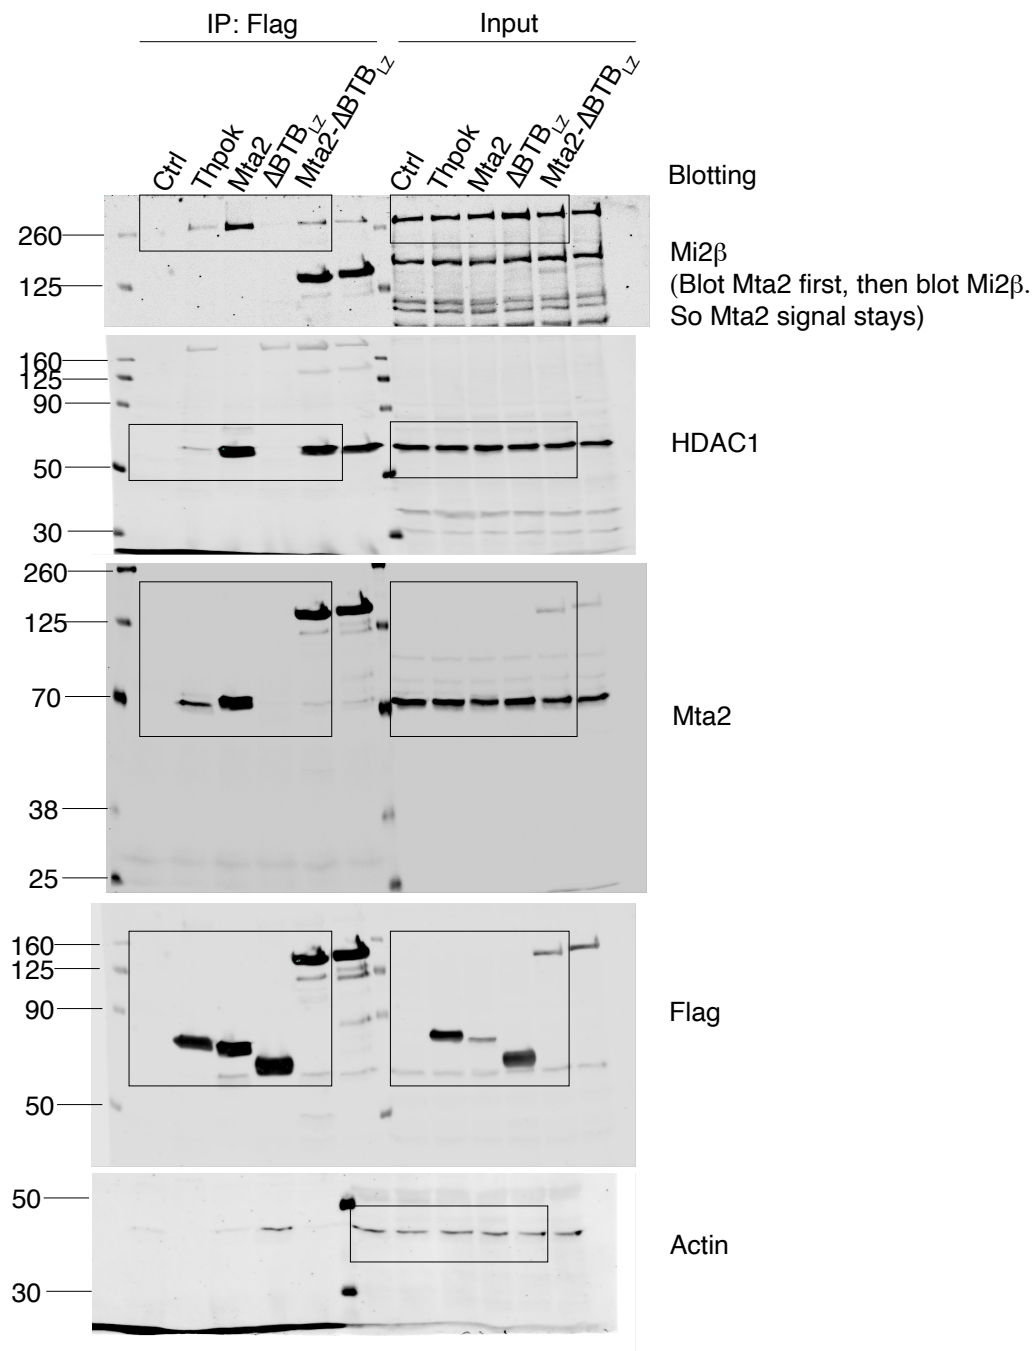

Figure S1

E

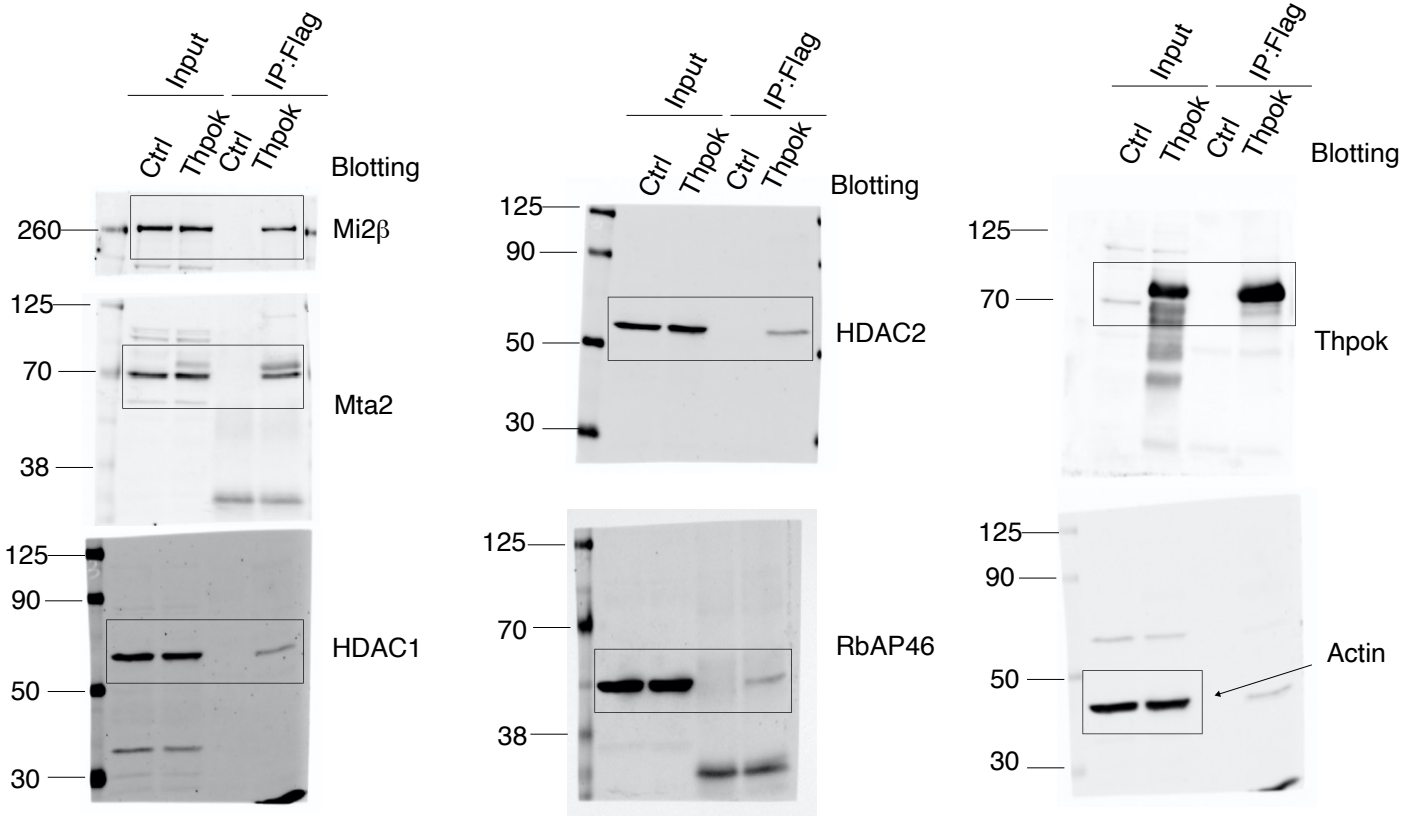

F

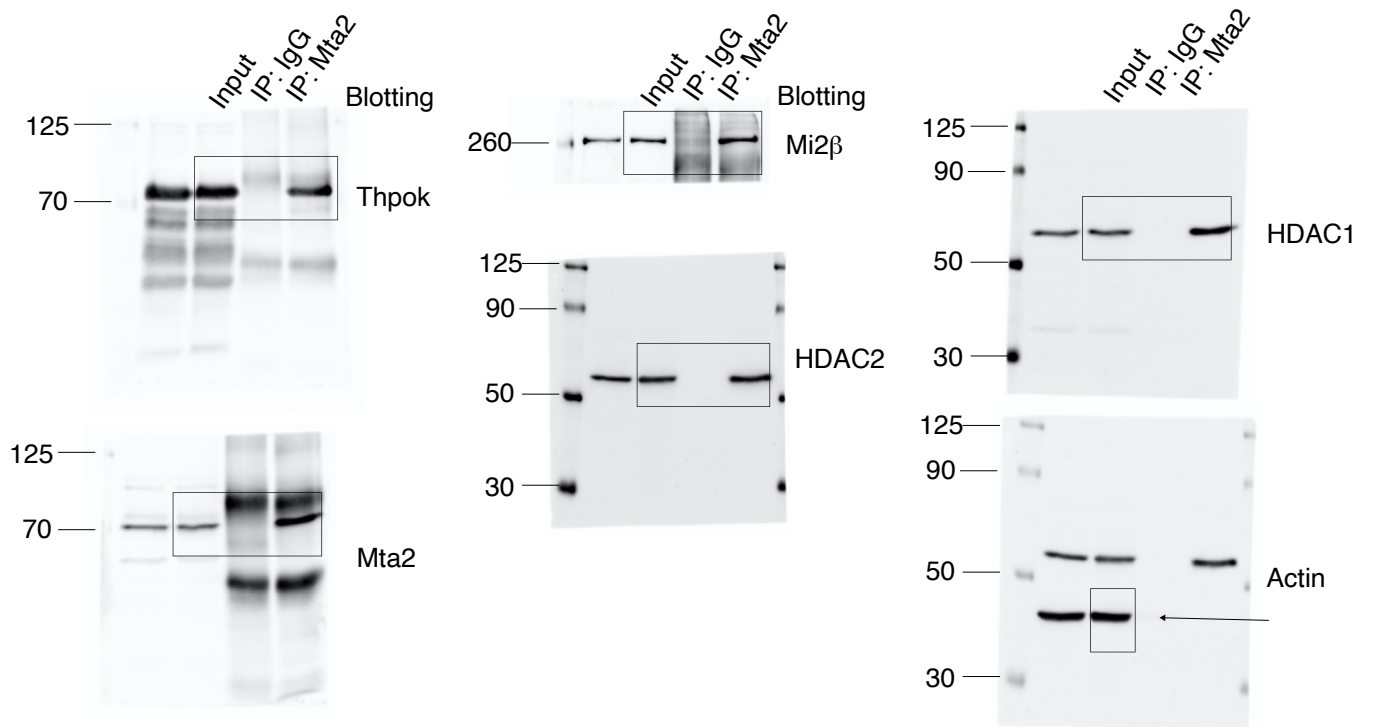

Figure S3C

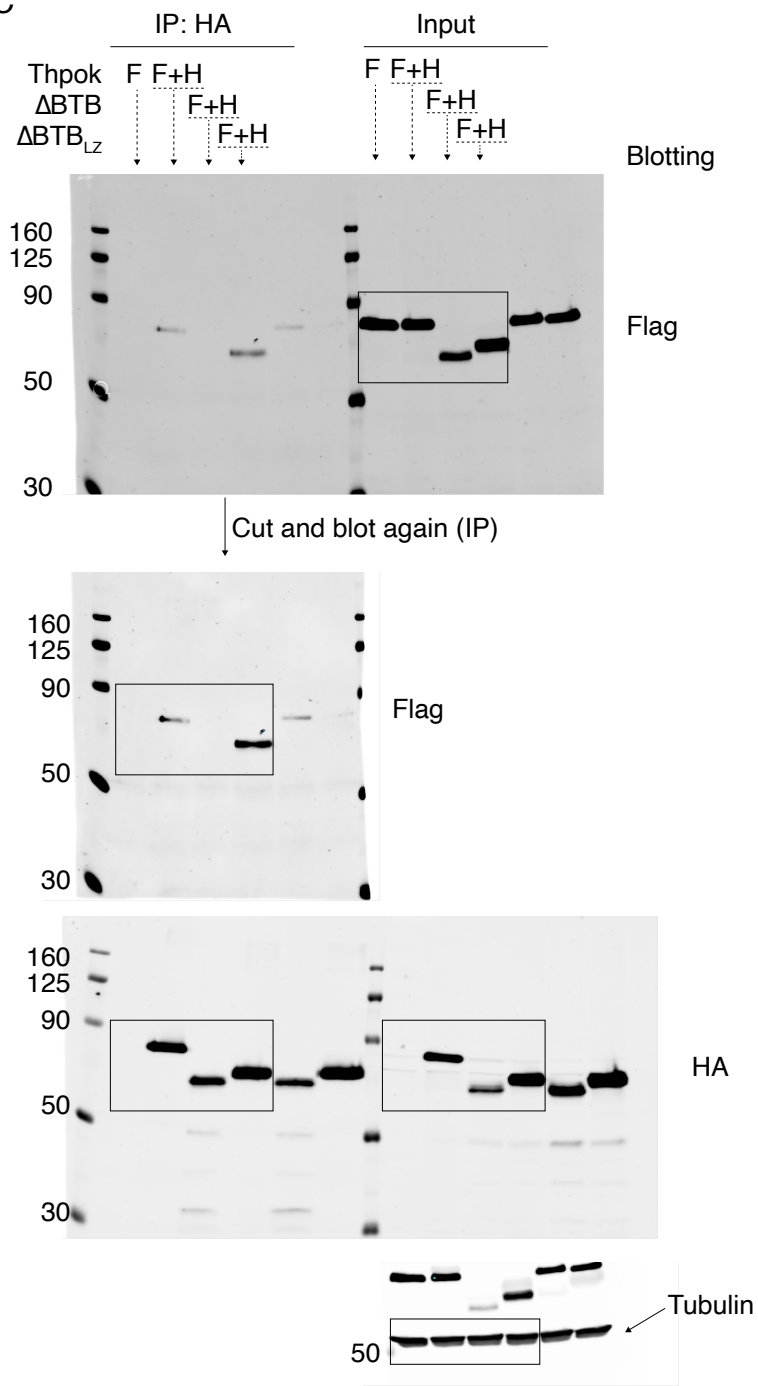

Figure S4B

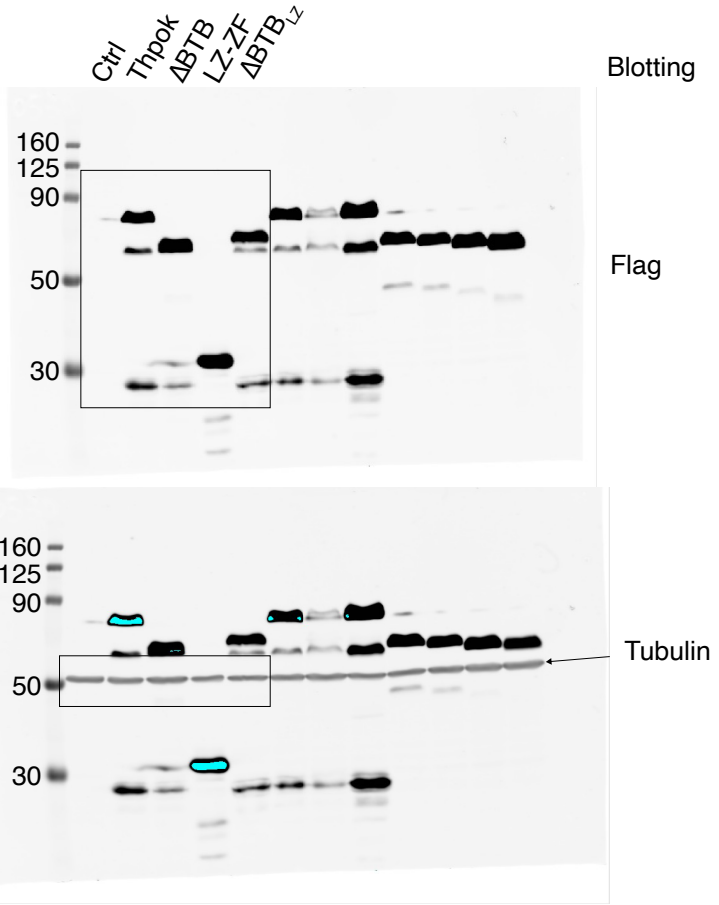



Figure S5

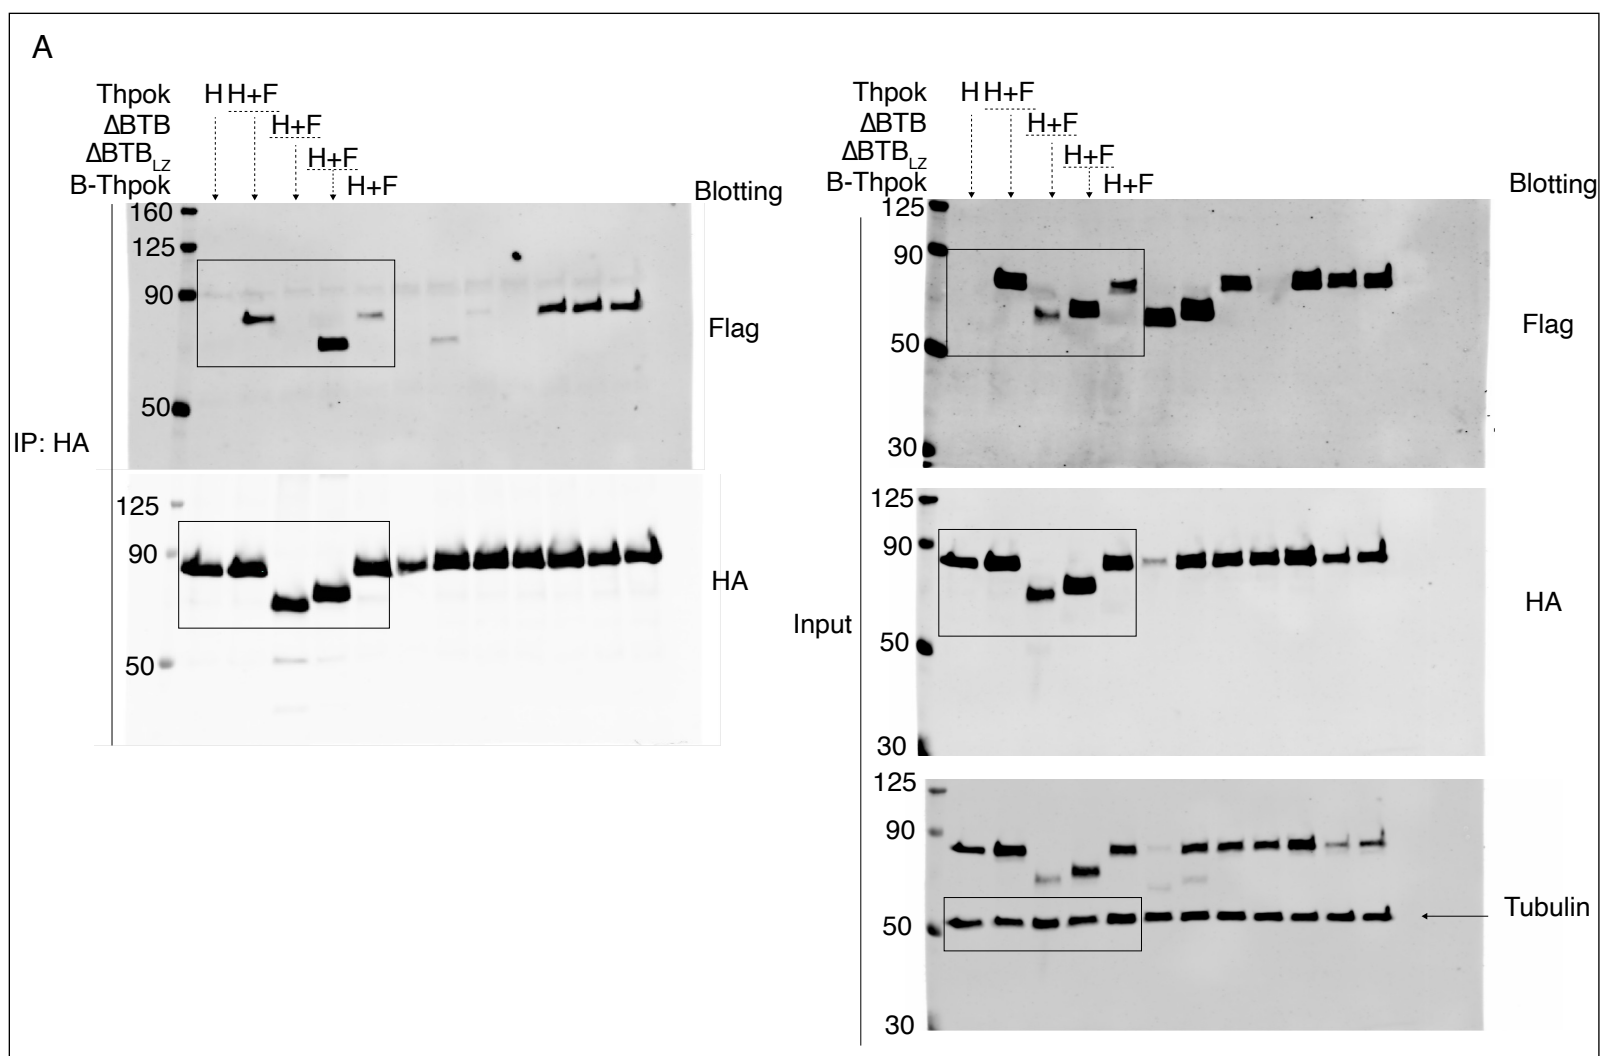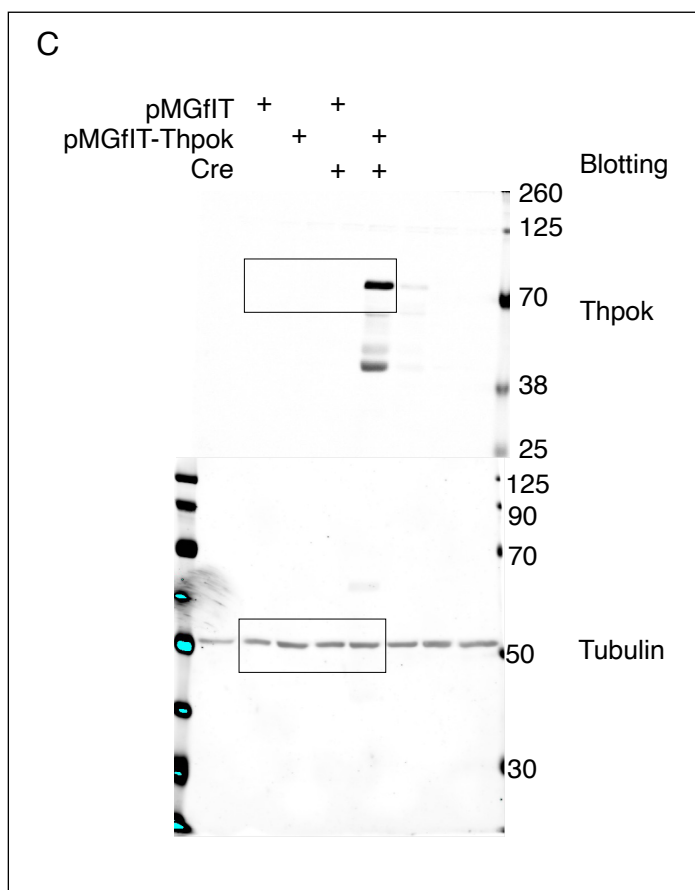

Figure S6

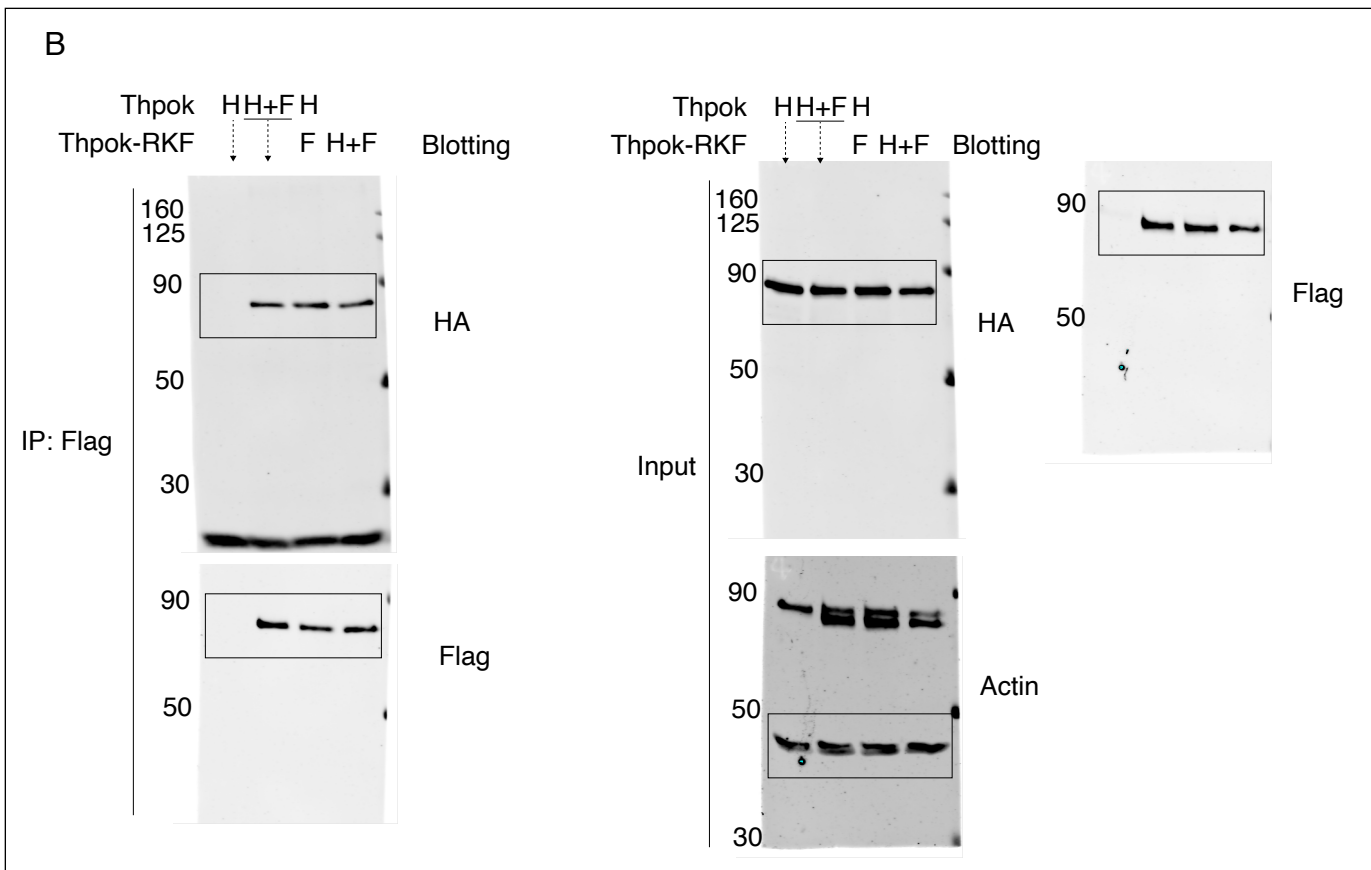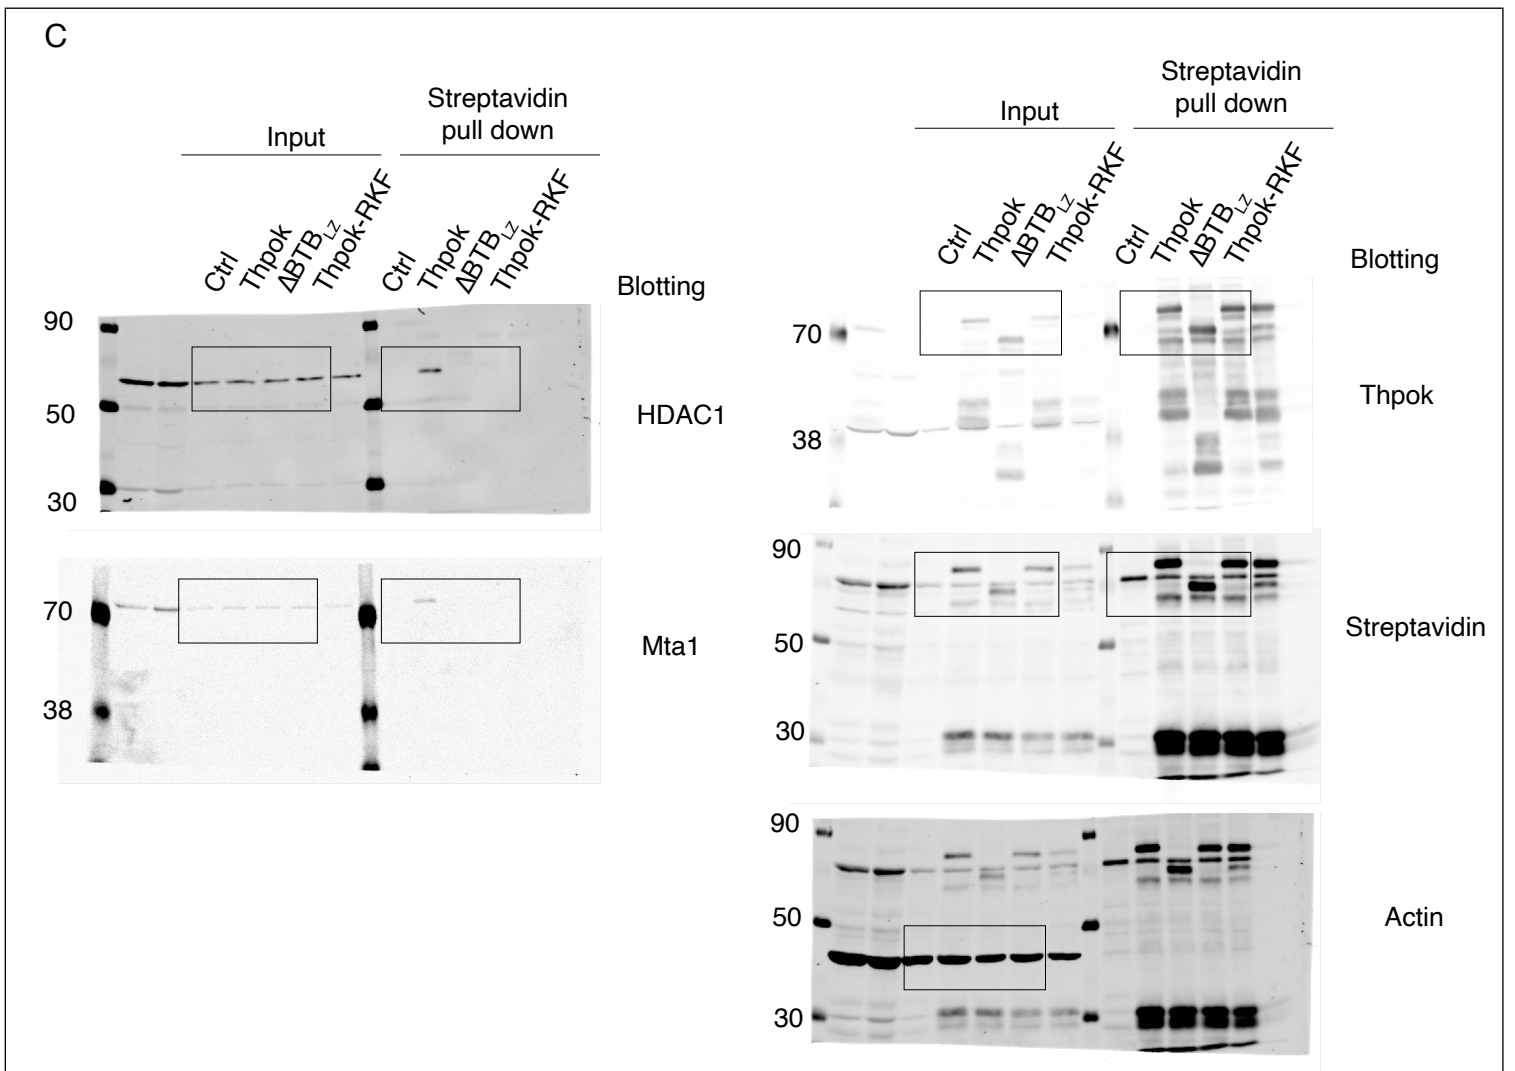

Figure S7A

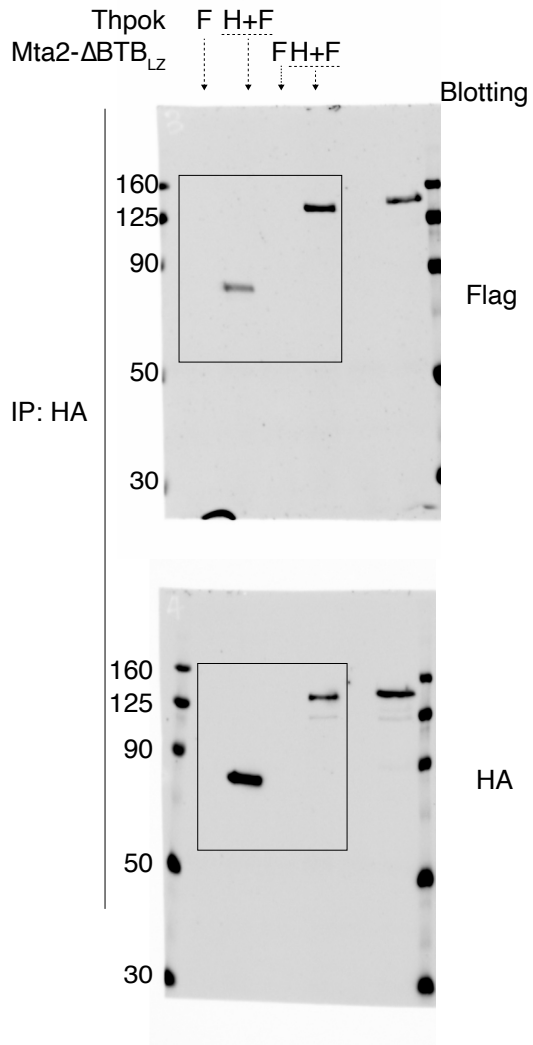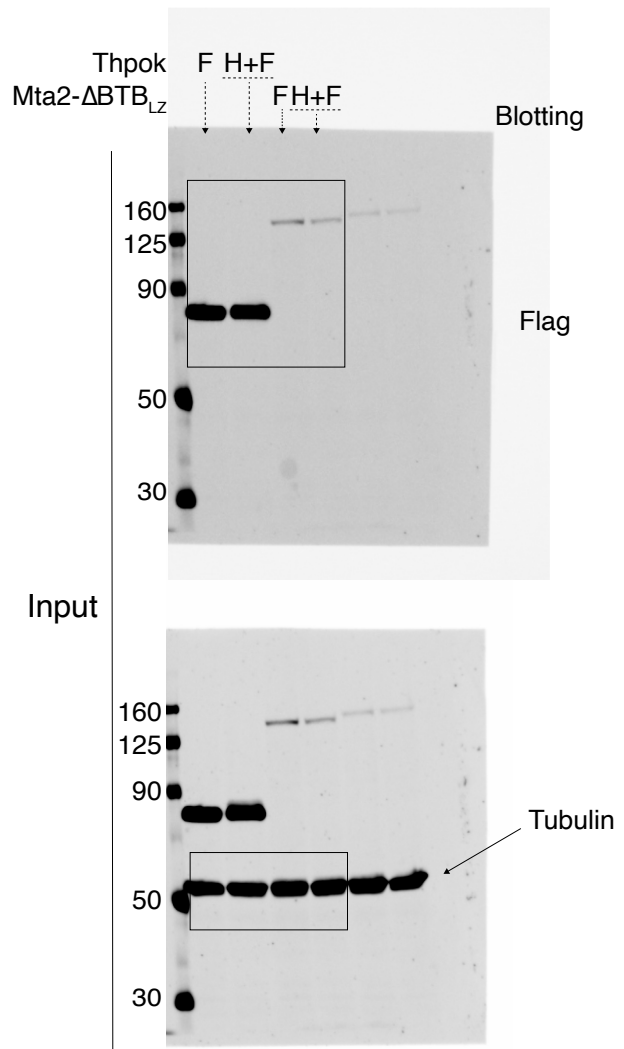

Supplement: NIHMS1824330-supplement-Data_file_S2.pdf [file NIHMS1824330-supplement-Data_file_S2.pdf]
